# Supplementary material for: Ultra-sensitive MicroRNA-21 detection based on multiple cascaded strand displacement amplification and CRISPR/Cpf1 (MC-SDA/CRISPR/Cpf1)
Source: Royal Society of Chemistry journal article supplement (doi:10.1039/d1cc01938d), 2021-01-01
Supplement: d1cc01938d1.pdf [file d1cc01938d1.pdf]

**Ultra-sensitive MicroRNA-21 detection based on multiple cascaded strand displacement amplification and CRISPR/Cpf1 (MC-SDA/CRISPR/Cpf1)**

Xiaolong Chen <sup>a</sup>, Yuanyi Deng <sup>a</sup>, Gaihua Cao <sup>a</sup>, Yifan Xiong <sup>a</sup>, Danqun Huo <sup>\*a,b</sup> and Changjun Hou <sup>\*a,b</sup>

<sup>a</sup>Key Laboratory for Biorheological Science and Technology of Ministry of Education, State and Local Joint Engineering Laboratory for Vascular Implants, Bioengineering College of Chongqing University, Chongqing 400044, PR China.

<sup>b</sup>Chongqing Key Laboratory of Bio-perception & Intelligent Information Processing, School of Microelectronics and Communication Engineering, Chongqing University, Chongqing, 400044, PR China.

\* Corresponding author. Tel.: +86 23 6511 2673; fax: +86 23 6510 2507.

E-mail addresses: [houcj@cqu.edu.cn](mailto:houcj@cqu.edu.cn) (C. Hou); [huodq@cqu.edu.cn](mailto:huodq@cqu.edu.cn) (D. Huo)

## **Experiment section**

### **Reagents and equipment**

The sequence information of all DNA fragments used in this paper can be seen in Table S1, and all of which were purchased from Sangon Biotech (Shanghai, China). T7 Mix, DNase I (2000 U/mL), Cpf1 (LbCas12a), Klenow Fragment (5000 U/mL), Nt.BbvCI (10000 U/mL) and their buffers were offered by New England Biotechnology Co., Ltd (Beijing, China). MiRcute miRNA Isolation Kit (DP501) ordered from TIANGEN Biotechnology Co., Ltd (Beijing, China) was used for the purification of crRNA. Both nucleoside triphosphate (NTPs) and deoxy-ribonucleoside triphosphate (dNTPs) were bought from Sangon Biotech (Shanghai, China). The fluorescence spectrum of the final signal was determined by LS-55 spectrofluorometer (Perkin Elmer, USA). During the measurement, the excitation wavelengths were set at 490 nm in the range of 400 nm to 700 nm.

### **Synthesis of crRNA**

First, 15  $\mu$ L of system included T7 promoter (10  $\mu$ M), crRNA-template (10  $\mu$ M) and appropriate RNase-free water was annealed at 95°C for 5 min. Then, the mixture was cooled to room temperature slowly and left to rest for some time. Afterwards, certain amount of T7 Mix (40 U), 1 $\times$ RNA polymerase buffer and NTPs (1  $\mu$ M) was added to the mixture and the final system was adjusted to 30  $\mu$ L. Then, keep the mixture at 37°C for 16 h to polymerize large number of crRNA. After that, 4  $\mu$ L of DNase I and 4  $\mu$ L 10 $\times$ DNase I buffer were added to the system and the final system was reacted at 37°C for 2 h to degrade the DNA completely. The obtained crRNAs were purified by miRcute miRNA Isolation Kit and stored at -20°C for later use.

### **Amplification of miR-21 by C-SDA or MC-SDA**

First, 5  $\mu$ L of system contained T-1 (20 nM) or mixture of T-1 (20 nM) and T-2 (20 nM), different concentrations of miR-21, 1  $\mu$ L 10 $\times$ NEB buffer 2 and some RNase-free water was annealed at 80°C for 5 min. Then, 0.5 U Klenow Fragment, 1 U Nt.BbvCI, 1  $\mu$ L 10 $\times$ CutSmart and 0.5  $\mu$ L of 25 mM dNTP were added to the system after it had been cooled to room temperature. The final system was adjusted to 10  $\mu$ L using RNase-free water. Then incubate the final system for 80 min at 37°C to obtain activators.

### **Measurement of the signal**

The obtain activators can activate the trans-cleavage activity of CRISPR/Cpf1, disintegrating the ssDNA reporter and generating a fluorescent signal. Specifically, 10  $\mu$ L CRISPR/Cpf1 system contained 2  $\mu$ M crRNA, 2  $\mu$ M Cas12a, 10  $\mu$ M ssDNA reporters, 2 $\times$ NEB buffer 2.1 and appropriate RNase-free water was mixed with the previous system. The final reaction system was incubated at 37°C for 1 h. Then, 80  $\mu$ L ddH<sub>2</sub>O was added to the final reaction system and transferred to a fluorescent cuvette. The LS-55 spectrophoto fluorometer was utilized to measure the fluorescent signal.

### **Gel electrophoresis**

The verification of purified crRNA was realized through a 3% agarose electrophoresis. The process was accomplished in 1 $\times$ TBE buffer at 120 V for 50 min. A bright band which represents crRNA can be seen in Fig. S1. Feasibility of C-SDA and MC-SDA were verified by 15% of polyacrylamide gel electrophoresis (PAGE). It

was completed in 1×TBE buffer at 120 V for 60 min. Gel images were observed using an Azure Biosystems C150 (USA).

**Table S1** The DNA sequences used in this work

| Name                                | Information of the DNA sequences (5'-3')                                                          |
|-------------------------------------|---------------------------------------------------------------------------------------------------|
| miR-21                              | UAG CUU AUC AGA CUG AUG UUG A                                                                     |
| template 1                          | AAAAAAAAAAAAAAAAAAAAAAAAAGCTGAGGAACCGCTGAGGTCAAC<br>ATCAGTCTGATAAGCTA                             |
| template 2                          | AAAAAAAAAAAAAAAAAAAAAAAAAGCTGAGGTCAACATCAGTCTGAT<br>AAGCTGAGGAACCGCTGA                            |
| Cleavage reporter<br>crRNA template | HEX- TATTATT- BHQ1<br>TTTTTTTTTTTTTTTTTTTTTTTTTATCTACACTTAGTAGAAATTACCCTATA<br>GTGAGTCGTATTAATTTC |
| T7 promoter                         | GAAATTAATACGACTCACTATAGGG                                                                         |
| miR-155                             | UUA AUG CUA AUC GUG AUA GGG GU                                                                    |
| miR-let7a                           | UGA GGU AGU AGG UUG UAU AGU U                                                                     |
| miR-122                             | UGG AGU GUG AC A AUG GUG UUU G                                                                    |
| miR-16                              | UAGCAGCACGUAAAUUUGGCG                                                                             |

**Table S2** Comparison of this method with other miR-21 sensors.

| <b>Method</b>                                                                | <b>Linear range</b>          | <b>LOD</b> | <b>Ref.</b>          |
|------------------------------------------------------------------------------|------------------------------|------------|----------------------|
| Au@Si nanocomposite labeled lateral flow assay                               | 10 pM-1 nM                   | 1 pM       | S1                   |
| DSN and visible-light-induced oxidase mimic activity                         | 50 fM-3 pM                   | 44.76 fM   | S2                   |
| phosphorescent resonance energy transfer of Mn-ZnS QDs                       | 8-80 nM                      | 1.6 nM     | S3                   |
| sulfonamide-bound antisense hybridization                                    | 10 fM-10 nM                  | 20 fM      | S4                   |
| MoS <sub>2</sub> and fluorescent dye-labeled DNA probe                       | 0-40 nM                      | 500 pM     | S5                   |
| Thionine and Gold Nanoparticles Co-Functionalized MoS <sub>2</sub> Nanosheet | 1 pM-10 nM                   | 0.26 pM    | S6                   |
| CHA and DNA-templated silver nanoclusters (DNA/AgNCs)                        | 200 pM-20 nM                 | 200 pM     | S7                   |
| DSN-assisted signal amplification strategy and PRET                          | 0.25-40 nM                   | 0.16 nM    | S8                   |
| RCA and polygonal-plate fluorescent-hydrogel                                 | 0.5-50 nM                    | 5 pM       | S9                   |
| MC-SDA and CRISPR/Cpf1                                                       | 10 fM-10 pM;<br>10 pM-100 nM | 10 fM      | <b>This<br/>work</b> |

**Table S3** Detection of miR-21 in normal human serum by the proposed MC-SDA/CRISPR/Cpf1.

| Target added (%) | Detected results (fM) | Recovery (%) |
|------------------|-----------------------|--------------|
| 0                | --                    | --           |
| 100 fM           | 99.49                 | 99.49        |
| 1 pM             | 1147.47               | 114.75       |
| 10 pM            | 9896.15               | 98.96        |

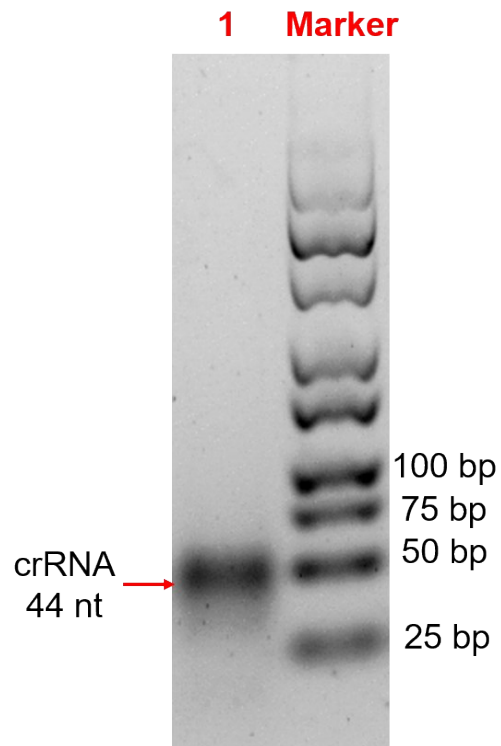

**Figure S1** Gel electrophoresis analysis of crRNA.

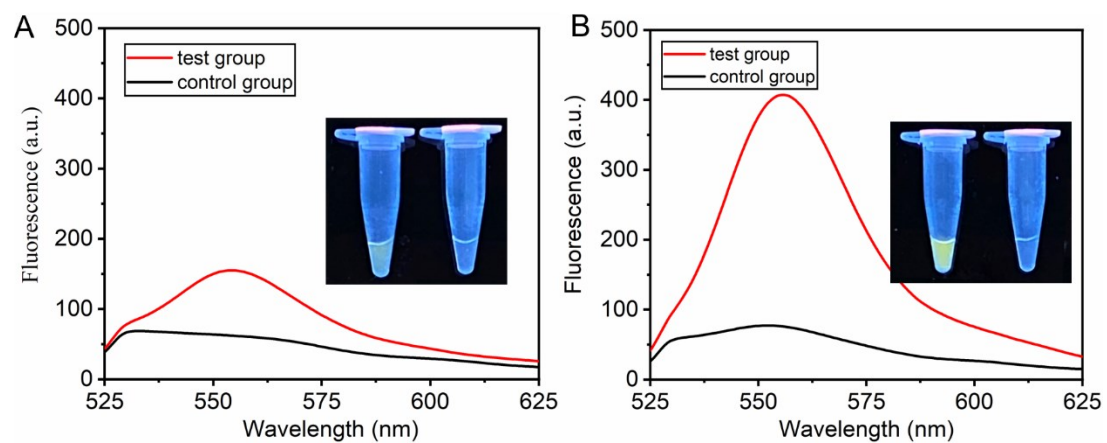

**Figure S2** Feasibility of the miR-21 detection based on C-SDA/CRISPR/Cpf1 (A) and MC-SDA/CRISPR/Cpf1 (B).

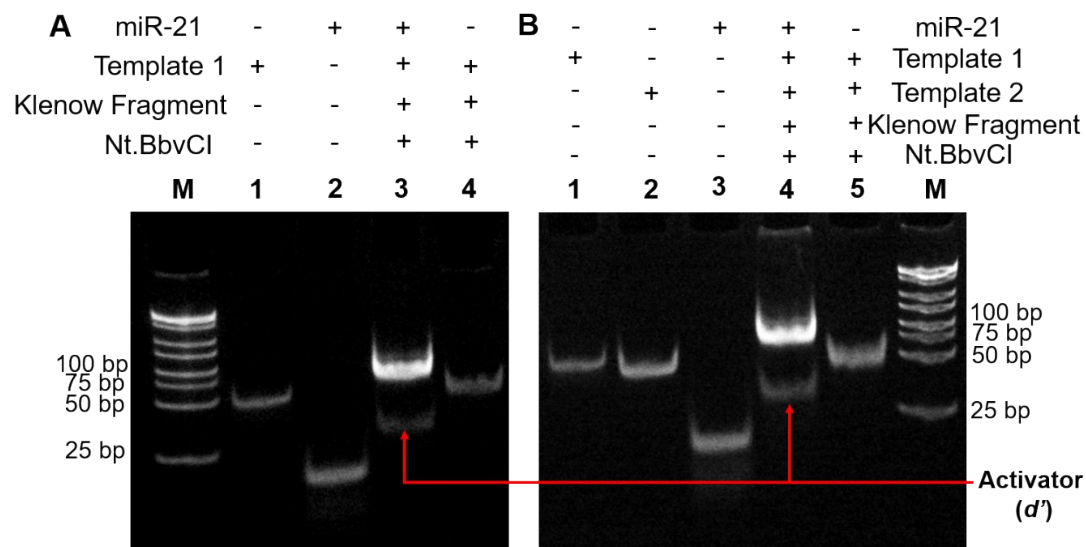

**Figure S3** (A) 15% polyacrylamide gel electrophoresis of C-SDA (M: Marker; Lane 1: Template 1; Lane 2: miR-21; Lane 3: experimental group; Lane 4: control group), (B) 15% polyacrylamide gel electrophoresis of MC-SDA (Lane 1: Template 1; Lane 2: Template 2; Lane 3: miR-21; Lane 4: experimental group; Lane 5: control group; M: marker).

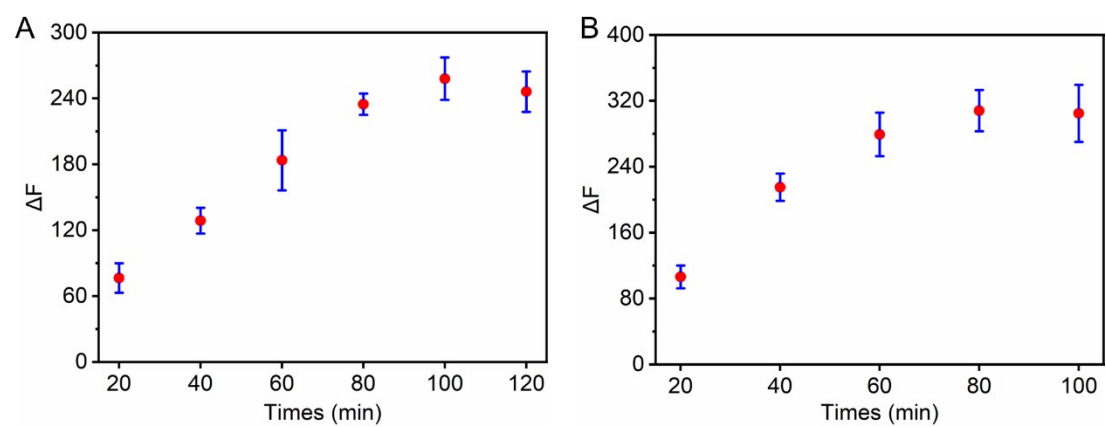

**Figure S4** Optimizations of the reaction time of MC-SDA (A) and the shearing time of CRISPR/Cpf1 (B).

- S1 T. Dong, R. Yin, Q. Yu, W. Qiu, K. Li, L. Qian, H. Li, B. Shen and G. Liu, *Anal Chim Acta*, 2021, **1147**, 56-63.
- S2 Y. Xia, T. Chen, L. Zhang, X. Zhang, W. Shi, G. Chen, W. Chen, J. Lan, C. Li, W. Sun and J. Chen, *Biosens Bioelectron*, 2021, **173**, 112834.
- S3 J. Lv, Y. Miao and G. Yan, *RSC Advances*, 2017, **7**(65), 41063-41069.
- S4 D.A. Smith, L.J. Newbury, G. Drago, T. Bowen and J.E. Redman, *Sens Actuators B Chem*, 2017, **253**, 335-341.
- S5 B. Cai, S. Guo and Y. Li, *Analytical Methods*, 2018, **10**(2), 230-236.
- S6 D. Zhu, W. Liu, D. Zhao, Q. Hao, J. Li, J. Huang, J. Shi, J. Chao, S. Su and L. Wang, *ACS Appl Mater Interfaces*, 2017, **9**(41), 35597-35603.
- S7 J. Gu, Z. Qiao, X. He, Y. Yu, Y. Lei, J. Tang, H. Shi, D. He and K. Wang, *Analyst*, 2020, **145**(15), 5194-5199.
- S8 J.J. Yang, Z.F. Zhang and G.Q. Yan, *Anal Biochem*, 2017, **539**, 127-133.
- S9 H. Song, Y. Zhang, S. Wang, K. Huang, Y. Luo, W. Zhang and W. Xu, *Sensors and Actuators B: Chemical*, 2020, **306**, 127554.
